# Supplementary material for: Quiescence status of glioblastoma stem-like cells involves remodelling of Ca2+ signalling and mitochondrial shape
Source: PubMed Central journal article supplement (PMC6021377; doi:10.1038/s41598-018-28157-8), 2018-06-27

## Quiescence status of glioblastoma stem-like cells involves remodelling of Ca<sup>2+</sup> signalling and mitochondrial shape

### AUTHORS

Francisco J. Aulestia<sup>1</sup>, Isabelle Néant<sup>1</sup>, Jihu Dong<sup>2</sup>, Jacques Haiech<sup>2</sup>, Marie-Claude Kilhoffer<sup>2</sup>, Marc Moreau<sup>1</sup>, and Catherine Leclerc<sup>1,\*</sup>

### Supplementary tables

**Table S1. Culture conditions for TG1 and TG1-C1 cells**

| <i>Experiment #</i> | <i>Cell line</i> | <i>Culture conditions</i>                   | <i>cellular state</i>        |
|---------------------|------------------|---------------------------------------------|------------------------------|
| 1                   | TG1              | NS34, pH 7.4                                |                              |
| 2                   | TG1              | NS34, pH 7.4                                |                              |
| 3                   | TG1              | NS34, pH 7.4                                | Proliferative (self-renewal) |
| 4                   | TG1_C1           | NS34, pH 7.4                                |                              |
| 5                   | TG1_C1           | NS34, pH 7.4                                |                              |
| 6                   | TG1              | No replacement of NS34 medium during 9 days |                              |
| 7                   | TG1_C1           | No replacement of NS34 medium during 9 days |                              |
| 8                   | TG1_C1           | NS34 pH 6.2 during 5 days                   | Quiescence                   |
| 9                   | TG1              | NS34 pH 6.2 during 5 days                   |                              |
| 10                  | TG1              | NS34 pH 6.5 during 5 days                   |                              |
| 11                  | TG1              | SKF-96365 (10μM) in NS34, pH 7.4            |                              |

**Table S2. List of Ca<sup>2+</sup> toolbox genes expressed in GSLCs.**

Among the 250 genes belonging to the Ca<sup>2+</sup> toolkit, 107 genes are expressed in GSLCs either in the proliferative or quiescent conditions (see Table S1). A fold change < 1 corresponds to down-regulation in quiescent GSLCs (highlighted in blue). Fold change is computer from normalized log2 transformed data as described in the experimental procedures. For a given gene, fold change is 2<sup>^(mean value quiescent cells – mean value proliferative cells)</sup>. CaBP, Calcium binding protein; TF, Transcription factor; ER/SR, Endoplasmic Reticulum/Sarcoplasmic Reticulum; ND, subcellular location not determined.

| Gene Symbol | Gene ID | Fold change | Function                 | Subcellular Location |
|-------------|---------|-------------|--------------------------|----------------------|
| VSNL1       | 7447    | 0.606635332 | CaBP                     | Cytosol / Membrane   |
| S100A3      | 6274    | 0.623029709 | CaBP                     | Cytosol / Nucleus    |
| SLC25A13    | 10165   | 0.643405378 | Ca <sup>2+</sup> outflow | Mitochondria         |
| S100B       | 6285    | 0.670835435 | CaBP                     | Cytosol / Nucleus    |
| SLC24A3     | 57419   | 0.741691947 | Ca <sup>2+</sup> outflow | Plasma membrane      |
| EFCAB13     | 124989  | 0.771550298 | CaBP                     | ND                   |
| RASGRP1     | 10125   | 0.776597738 | CaBP                     | ND                   |
| EFHD2       | 79180   | 0.777477086 | CaBP                     | ND                   |
| MCU         | 90550   | 0.779598892 | Ca <sup>2+</sup> outflow | Mitochondria         |
| MICU2       | 221154  | 0.779701352 | Ca <sup>2+</sup> outflow | Mitochondria         |
| ITPR2       | 3709    | 0.791205823 | Ca entry                 | ER/SR                |
| S100A16     | 140576  | 0.799640954 | CaBP                     | Cytosol              |
| MYL6        | 4637    | 0.803082585 | CaBP                     | ND                   |
| CETN3       | 1070    | 0.806671381 | CaBP                     | Centrosome           |
| PKD2        | 5311    | 0.824052572 | Ca entry                 | Plasma membrane      |
| CACNA2D1    | 781     | 0.825506866 | Ca entry                 | Plasma membrane      |
| S100A10     | 6281    | 0.829648793 | CaBP                     | Cytosol / Nucleus    |
| CACNA1C     | 775     | 0.830254197 | Ca entry                 | Plasma membrane      |
| NUCB2       | 4925    | 0.838697314 | CaBP / DNA binding       | Cytosol              |
| ATP2B2      | 491     | 0.844160676 | Ca <sup>2+</sup> outflow | Plasma membrane      |
| CALM1       | 801     | 0.85573566  | CaBP                     | Cytosol              |
| RASEF       | 158158  | 0.862091482 | CaBP                     | Cytosol              |
| RCN2        | 5955    | 0.863518476 | CaBP                     | ER                   |
| CETN2       | 1069    | 0.864145756 | CaBP                     | Centrosome           |
| CALM2       | 805     | 0.864191592 | CaBP                     | Cytosol              |
| LETM1       | 3954    | 0.87683773  | Ca <sup>2+</sup> outflow | Mitochondria         |
| EFHC1       | 114327  | 0.877512217 | CaBP                     | Cytosol              |
| S100A4      | 6275    | 0.880372941 | CaBP                     | Cytosol / Nucleus    |
| ORAI2       | 80228   | 0.882773757 | Ca entry                 | Plasma membrane      |
| CALM3       | 808     | 0.889790297 | CaBP                     | Cytosol              |
| ITPR3       | 3710    | 0.89111346  | Ca entry                 | ER/SR                |
| STIM2       | 57620   | 0.891906142 | Ca entry                 | ER/SR                |
| S100A1      | 6271    | 0.894057453 | CaBP                     | Cytosol / Nucleus    |
| VDAC1       | 7416    | 0.89487958  | channel                  | Mitochondria         |
| MYL12B      | 103910  | 0.89888984  | CaBP                     | cytosol              |

|          |        |             |                          |                     |
|----------|--------|-------------|--------------------------|---------------------|
| CALU     | 813    | 0.899016738 | CaBP                     | ER                  |
| MYL12A   | 10627  | 0.904072046 | CaBP                     | Cytosol             |
| S100A11  | 6282   | 0.906369627 | CaBP                     | Cytosol / Nucleus   |
| CALR     | 811    | 0.907804906 | CaBP                     | ER                  |
| CAB39    | 51719  | 0.908084214 | CaBP                     | Cytosol             |
| MICU1    | 10367  | 0.912965178 | Ca <sup>2+</sup> outflow | Mitochondria        |
| MYL6B    | 140465 | 0.913026094 | CaBP                     | Cytosol             |
| TRPM8    | 79054  | 0.916101217 | Ca entry                 | Plasma membrane     |
| ATP2B1   | 490    | 0.916224957 | Ca <sup>2+</sup> outflow | Plasma membrane     |
| NCALD    | 83988  | 0.91999191  | CaBP                     | Cytosol             |
| S100A2   | 6273   | 0.921293378 | CaBP                     | Cytosol / Nucleus   |
| MCTP1    | 79772  | 0.92139107  | CaBP                     | Membrane            |
| TPCN2    | 219931 | 0.922363162 | Ca entry                 | Membrane / Lysosome |
| SLC25A12 | 8604   | 0.928004563 | Ca <sup>2+</sup> outflow | Mitochondria        |
| SRI      | 6717   | 0.93116945  | CaBP                     | Cytosol / SR        |
| VDAC3    | 7419   | 0.931555867 | channel                  | Mitochondria        |
| CARHSP1  | 23589  | 0.940751493 | CaBP                     | Cytosol             |
| ATP2C1   | 27032  | 0.949672997 | Ca <sup>2+</sup> outflow | Plasma membrane     |
| S100A13  | 6284   | 0.951274991 | CaBP                     | Cytosol / Nucleus   |
| S100A6   | 6277   | 0.953499198 | CaBP                     | Cytosol / Nucleus   |
| TRPM7    | 54822  | 0.956226528 | Ca entry                 | Plasma membrane     |
| EFCAB11  | 90141  | 0.958138525 | CaBP                     | ND                  |
| ATP2B4   | 493    | 0.961005092 | Ca <sup>2+</sup> outflow | Plasma membrane     |
| STC1     | 6781   | 0.964208543 | CaBP                     | Secreted            |
| ORAI1    | 84876  | 0.964939058 | Ca entry                 | Plasma membrane     |
| HPCAL1   | 3241   | 0.967616558 | CaBP                     | Membrane            |
| CAB39L   | 61617  | 0.971555114 | CaBP                     | ND                  |
| MYL9     | 10398  | 0.972350121 | CaBP                     | Cytosol             |
| NCS1     | 23413  | 0.975012004 | CaBP                     | Cytosol             |
| MICU3    | 286097 | 0.978178382 | Ca <sup>2+</sup> outflow | Mitochondria        |
| TRPC1    | 7220   | 0.988282204 | Ca entry                 | Plasma membrane     |
| VDAC2    | 7417   | 0.996251523 | channel                  | Mitochondria        |
| PSEN1    | 5663   | 0.999276936 | CaBP                     | Membrane            |
| GCA      | 25801  | 0.999806046 | CaBP                     | Cytosol             |
| CAPS2    | 84698  | 1.00509083  | CaBP                     | ND                  |
| CACNG4   | 27092  | 1.00808823  | Ca entry                 | Plasma membrane     |
| ATP2A2   | 488    | 1.01196682  | Ca <sup>2+</sup> outflow | ER/SR               |
| CACNB4   | 785    | 1.01560533  | Ca entry                 | Plasma membrane     |
| EFCAB14  | 9813   | 1.01783824  | CaBP                     | ND                  |
| RCN1     | 5954   | 1.02335477  | CaBP                     | ER                  |
| CHP1     | 11261  | 1.03763425  | CaBP                     | Cytosol / Nucleus   |
| NUCB1    | 4924   | 1.0463016   | TF                       | Golgi               |
| PSEN2    | 5664   | 1.05628753  | CaBP                     | Membrane            |
| CACFD1   | 11094  | 1.06460106  | Ca entry                 | Plasma membrane     |
| SLC24A1  | 9187   | 1.0790931   | Ca <sup>2+</sup> outflow | Plasma membrane     |
| CLGN     | 1047   | 1.09286618  | CaBP                     | ER                  |

|           |        |            |                          |                      |
|-----------|--------|------------|--------------------------|----------------------|
| SLC25A23  | 79085  | 1.09671128 | Ca <sup>2+</sup> outflow | Mitochondria         |
| CACNA1H   | 8912   | 1.10686553 | Ca entry                 | Plasma membrane      |
| CACNB3    | 784    | 1.11599135 | Ca entry                 | Plasma membrane      |
| ATP2A3    | 489    | 1.13170516 | Ca <sup>2+</sup> outflow | ER/SR                |
| ATP2A1    | 487    | 1.13189495 | Ca <sup>2+</sup> outflow | ER/SR                |
| PKD1L2    | 114780 | 1.13193941 | Ca entry                 | Membrane             |
| NECAB3    | 63941  | 1.13303959 | CaBP                     | Golgi                |
| STIM1     | 6786   | 1.13753235 | Ca entry                 | ER/SR                |
| CALCOCO2  | 10241  | 1.14259505 | CaBP                     | Cytosol              |
| ITPR1     | 3708   | 1.15209162 | Ca entry                 | ER/SR                |
| TRPM4     | 54795  | 1.19094431 | Ca entry                 | Plasma membrane      |
| RAB11FIP3 | 9727   | 1.19934535 | CaBP                     | Cytosol / Centrosome |
| PKD1      | 5310   | 1.19998717 | Ca entry                 | Plasma membrane      |
| GUCA1B    | 2979   | 1.25257576 | CaBP                     | Membrane             |
| ZZEF1     | 23140  | 1.29527771 | TF                       | <i>ND</i>            |
| RCN3      | 57333  | 1.35777569 | CaBP                     | ER                   |
| SLC8B1    | 80024  | 1.40965879 | Ca entry                 | Mitochondria         |
| CALCOCO1  | 57658  | 1.41236198 | CaBP                     | Cytosol              |
| ORAI3     | 93129  | 1.43146002 | Ca entry                 | Plasma membrane      |
| MYL5      | 4636   | 1.44176078 | CaBP                     | Cytosol              |
| CARF      | 79800  | 1.45379829 | TF                       | Nucleus              |
| TPCN1     | 53373  | 1.50876069 | Ca entry                 | Membrane / Lysosome  |
| CAPS      | 828    | 1.87185323 | CaBP                     | Cytosol              |
| EFHD1     | 80303  | 1.93805242 | CaBP                     | Mitochondria         |
| CACNB1    | 782    | 2.0890739  | Ca entry                 | Plasma membrane      |

---

**Table S3. List of antibodies used.**

| <b><i>Name</i></b> | <b><i>Type, Company</i></b>                       | <b><i>Dilution</i></b> |
|--------------------|---------------------------------------------------|------------------------|
| Anti-Sox2          | Rabbit Polyclonal, <i>Abcam</i>                   | 1/100                  |
| Anti-Nanog         | Goat Polyclonal, <i>R&amp;D Systems</i>           | 1/100                  |
| Anti-Olig2         | Rabbit Polyclonal, <i>Millipore Bioscience</i>    | 1/500                  |
| Anti-TOM20         | Rabbit Polyclonal, <i>Santa Cruz Bioechnology</i> | 1/100                  |
| Anti-Ki67          | Mouse, <i>Dako</i>                                | 1/100                  |
| Anti-GFP           | Mouse, <i>Roche</i>                               | 1/1000                 |

**Table S4. Sequences of primers used**

| Gene name           | Accession number | Primer sequences (5'-3')                            | Position     | Amplicon size | References |
|---------------------|------------------|-----------------------------------------------------|--------------|---------------|------------|
| <i>Tata box BP</i>  | NM_003194        | GAGCTGTGATGTGAAGTTTCC<br>TCTGGGTTTGATCATTCTGTAG     | 1059<br>1176 | 117 bp        | (1)        |
| <i>CDKN1A (p21)</i> | NM_000389        | GACTCTCAGGGTCGAAAACG<br>GGATTAGGGCTTCCTCTTGG        | 531<br>623   | 94 bp         | (2)        |
| <i>CCNB1</i>        | NM_031966        | TCTTCCAGTTATGCAGCACCT<br>AGCATGCTTCGATGTGGCAT       | 1381<br>1464 | 103 bp        | primer3    |
| <i>GOS2</i>         | NM_015714.3      | AAGGGGAAGATGGTGAAGCTG<br>CTGCACACAGTCTCCATCAGG      | 315<br>400   | 85 BP         | primer3    |
| <i>CCNA2</i>        | NM_001237        | GAAGATGAAAAGCCAGTGAGTGT<br>TGGCTGTTTCTTCATGTAACCC   | 798<br>896   | 120 bp        | primer3    |
| <i>CCND1</i>        | NM_053056.2      | CCTGTCCTACTACCGCCTCA<br>CAGTCCGGGTCACACTTGA         | 878<br>937   | 59 bp         | (3)        |
| <i>CCND3</i>        | NM_001760        | AGGGATCACTGGCACTGAAGT<br>CTGGAGCTGGTCTGAGAGGC       | 909<br>971   | 102 bp        | Primer3    |
| <i>CCNE2</i>        | NM_057749        | TTTGGCTATGCTGGAGGAAGT<br>AGTGCTCTTCGGTGGTGTCA       | 1193<br>1276 | 103 bp        | Primer3    |
| <i>HES1</i>         | NM_005524.3      | ACGTGCGAGGGCGTTAATAC<br>GGGGTAGGTCATGGCATTGA        | 618<br>707   | 89 bp         | (4)        |
| <i>PCNA</i>         | NM_002592        | GCCACTCCACTCTTTCAACG<br>ATCCTCGATCTTGGGAGCCA        | 911<br>991   | 120 bp        | Primer3    |
| <i>STIM1</i>        | NM_003156.3      | TGTGGAGCTGCCTCAGTATG<br>CTTCAGCACAGTCCCTGTCA        | 1000<br>1108 | 108 bp        | (5)        |
| <i>STIM2</i>        | NM_020860        | GACGTCAGTATGCAGAACAG<br>GACCAACTGCTTCTCAGTTC        | 1478<br>1565 | 87 bp         | (5)        |
| <i>Orai1</i>        | NM_032790        | ATGGTGGCAATGGTGGAG<br>CTGATCATGAGCGCAAACAG          | 494<br>615   | 121 bp        | (5)        |
| <i>Orai2</i>        | NM_032831        | GCAGCTACCTGGAAGTGGTC<br>CGGGTACTGGTACTGCGTCT        | 349<br>524   | 175 bp        | (6)        |
| <i>Orai3</i>        | NM_152288        | GGCCAAGCTCAAAGCTTCC<br>CCTGGTGGGTACTCGTGGT          | 380<br>484   | 104 bp        | (7)        |
| <i>MCU</i>          | NM_138357.2      | CGCCAGGAATATGTTTATCCA<br>CTTGTAAATGGGTCTCTCAGTCTCTT | 877<br>1039  | 162 bp        | primer3    |
| <i>CCDC109B</i>     | NM_017918        | GGCCTTCCCTTGGTAACACT<br>GTTGCCATCTGCTGTGAAGA        | 338<br>493   | 156 bp        | (8)        |
| <i>MICU1</i>        | NM_006077.3      | ACAGTGGCTAAAGTGGAGC<br>GTTTGGGTAAAGCGAAGTCC         | 1393<br>1615 | 222 bp        | primer3    |
| <i>MICU2</i>        | NM_152726        | GGCAGTTTTACAGTCTCCGC<br>AAGAGGAAGTCTCGTGGTGTCT      | 255<br>400   | 153 bp        | (9)        |

1. Valente V, *et al.* (2009) Selection of suitable housekeeping genes for expression analysis in glioblastoma using quantitative RT-PCR. *BMC Mol Biol* 10:17.
2. Saigusa S, *et al.* (2012) Gene expression profiles of tumor regression grade in locally advanced rectal cancer after neoadjuvant chemoradiotherapy. *Oncol Rep* 28(3):855-861.
3. Tobin NP, Sims AH, Lundgren KL, Lehn S, & Landberg G (2011) Cyclin D1, Id1 and EMT in breast cancer. *BMC Cancer* 11:417.

4. Gao F, *et al.* (2014) Hes1 is involved in the self-renewal and tumourigenicity of stem-like cancer cells in colon cancer. *Sci Rep* 4:3963.
5. El Boustany C, *et al.* (2010) Differential roles of STIM1, STIM2 and Orai1 in the control of cell proliferation and SOCE amplitude in HEK293 cells. *Cell Calcium* 47(4):350-359.
6. Motiani RK, Abdullaev IF, & Trebak M (2010) A novel native store-operated calcium channel encoded by Orai3: selective requirement of Orai3 versus Orai1 in estrogen receptor-positive versus estrogen receptor-negative breast cancer cells. *J Biol Chem* 285(25):19173-19183.
7. Borowiec AS, *et al.* (2014) Are Orai1 and Orai3 channels more important than calcium influx for cell proliferation? *Biochim Biophys Acta* 1843(2):464-472.
8. Raffaello A, *et al.* (2013) The mitochondrial calcium uniporter is a multimer that can include a dominant-negative pore-forming subunit. *EMBO J* 32(17):2362-2376.
9. Patron M, *et al.* (2014) MICU1 and MICU2 finely tune the mitochondrial Ca<sup>2+</sup> uniporter by exerting opposite effects on MCU activity. *Mol Cell* 53(5):726-737.

## Quiescence status of glioblastoma stem-like cells involves remodelling of Ca<sup>2+</sup> signalling and mitochondrial shape

### AUTHORS

Francisco J. Aulestia<sup>1</sup>, Isabelle Néant<sup>1</sup>, Jihu Dong<sup>2</sup>, Jacques Haiech<sup>2</sup>, Marie-Claude Kilhoffer<sup>2</sup>, Marc Moreau<sup>1</sup>, and Catherine Leclerc<sup>1,\*</sup>

### Supplementary Legends

#### Figure S1. In vitro induction of quiescence in TG1 cells.

**(A)** Trypan blue viability test. TG1 cells at pH 7.4 (filled black bars) and pH 6.5 (striped black bars) and TG1\_C1 cells at pH 7.4 (filled grey bars) and at pH 6.5 (striped grey bars). Each measure was done in triplicates and with 3 independent experiments. **(B)** Histogram plot of the percentage of EdU and Ki67 positive cells in NS34 at pH 7.4 (black bars) or pH 6.5 (white bars), determined by analysis of 6 confocal microscopy fields. Error bars are derived from 3 independent experiments. **(C)** TG1 cells induced to quiescence continue to express stemness markers. Immunofluorescence analysis of stemness markers (NANOG, OLIG2 and SOX2) after 5 days in culture at pH 7.4 (proliferating condition, left panel) and at pH 6.5 (quiescent condition, right panel). Nuclei were visualized by Draq5 staining. Pictures taken with a 63X 1.40 N.A. objective on a Leica SP8 upright confocal microscope. Scale bar = 20 μm.

#### Figure S2. The cell-cycle arrest induced by low extracellular pH is reversible.

**(A)** Proliferating TG1 cells were cultured for 5 days in NS34 medium at pH 6.5 to induce quiescence and then either transferred back to NS34 at pH 7.4 (black dots) or to NS34 at pH 6.5 (grey squares) for an additional 5 days and the number of viable cells counted. **(B)** Histogram plot of the percentage of EdU and Ki67 positive cells in NS34 at pH 7.4 (black bars), pH 6.5 (open bars) and reversible conditions (pH 6.5 to pH 7.4; grey bars), determined by analysis of 6 confocal microscopy fields. Error bars are derived from 3 independent experiments. **(C)** Expression of *CDKN1A*, *CCNB1* and *GOS2* was assessed by QRT-PCR in TG1 cells cultured for 5 days in proliferating (NS34 at pH 7.4, black bars), quiescent (NS34 at pH 6.5, open bars) and reversible conditions (NS34 at pH 6.5 and then 5 days at pH 7.4, grey bars). Results are given relative to *TBP* (TATA-Box Binding Protein) expression level. Error bars are derived from 11 independent experiments (pH 7.4 and pH 6.5) and from 3 independent experiments (pH 6.5 to pH 7.4).

#### Figure S3. In vitro induction of quiescence in BTIC25 cells.

**(A)** BTIC25 cells were cultured for 5 days in NS34 medium at pH 7.5 (a) or pH 6.5 (b) to assess their ability to proliferate or to stop proliferation and go to quiescence. In NS34 medium, cells are floating and never form monolayer. **(B)** Cell proliferation measured by counting the number of viable cells over 5 days in NS34 at pH 7.4 in absence (black bars) or presence of SKF96365 (10 μM) (striped bars) and in NS34 at pH 6.5 (open bars) for TG1 cells (left panel) and for BTIC25 cells (right panel). Each measure were done in duplicate and with 3 independent experiments. **(C)** Expression of *CDKN1A*, *CCNB1* and *GOS2* was assessed by QRT-PCR in TG1 cells after 5 days in NS34 at pH 7.4 in absence (black bars) or presence of SKF96365 (10 μM) (striped bars) and in NS34 at pH 6.5 (open bars) for BTIC25 cells. Results



are given relative to *TBP* (TATA-Box Binding Protein) expression level. Error bars are derived from 11 independent experiments. Error bars are derived from 3 independent experiments. Pictures were taken with a 20X 0.40 N.A. objective on Nikon eclipse TS100 microscope. Scale bars: 100  $\mu\text{m}$  in A.

**Figure S4. Remodeling of SOCE activity between proliferative and quiescent GSLCs.**

**(A)** Structure of the chimeric gene encoding the CytGA probe. The open-reading frame (ORF) encoding the Green Fluorescent Protein (EGFP) is linked to the ORF encoding the apo-aequorin as described previously<sup>1</sup>. Confocal microscopy observation of the GFP signal of electroporated TG1 cells showed good expression of the probe in the cytosol (green). Nucleus was labelled with Draq5 (blue). Scale bar: 5  $\mu\text{m}$ . **(B)** Structure of the chimeric gene encoding the MitGA probe. The open-reading frame (ORF) encoding the Green Fluorescent Protein (EGFP) is linked to the ORF encoding the apo-aequorin and to the mitochondrial targeting sequence Cox VIII. Confocal microscopy observation of the GFP signal of electroporated TG1 cells showed good expression of the probe in the mitochondria (merge). Nucleus was labeled with Draq5 (blue) and mitochondria with anti-TOM20 (red). **(C)** Representative PMT traces obtained from CytGA expressing TG1\_C1 cells in proliferating (left panel, pH 7.4) or in quiescent (right panel, pH 6.5) conditions. Values are plotted as  $L/L_{\text{TOTAL}}$  and every trace is the mean of 3 independent experiments. Prior to recording, cells were washed with  $\text{Ca}^{2+}$ -free medium. The arrows indicate the time at which medium containing 1 mM  $\text{Ca}^{2+}$  is perfused. Pictures in A and B were taken with a 63X 1.40 N.A. objective on a Leica SP8 upright confocal microscope.

**Figure S5. Calcium signaling is involved in the induced-quiescent state.**

**(A)** Cell proliferation measured by counting the number of viable cells over 5 days in NS34 medium at pH 7.4 in absence (black bars) or presence of EGTA (5 or 10  $\mu\text{M}$ ) (grey bars). Each measure was done in triplicates; 3 independent experiments were performed. **(B)** Expression of *CDKN1A*, *CCNB1* and *GOS2* was assessed by QRT-PCR after 5 days of culture in TG1 cells in NS34 at pH7.4 in absence (black bars) or presence of EGTA (grey bars) and compared to TG1 cells in NS34 at pH 6.5 (open bars). Results are given relative to *TBP* (TATA-Box Binding Protein) expression level. Error bars are derived from 11 independent experiments. **(C)** Expression of cyclins required during the different phases of the cell cycle; *CCND1*, *D3* (G1), *E2* (G1/S transition) and *A2* (S/G2 transition), of *PCNA* (Proliferating Cell Nuclear Antigen) and of *Hes1* which is known to be involved in the control of the reversibility of cellular quiescence. Expression of these cell cycle markers was assessed by QRT-PCR after 5 days of culture in TG1 cells in NS34 at pH7.4 in absence (black bars) or presence of EGTA (grey bars) and compared to TG1 cells in NS34 at pH 6.5 (open bars). Results are given relative to *TBP* (TATA-Box Binding Protein) expression level. Error bars are derived from 4 independent experiments. **(D)** Immunofluorescence for Ki67 of TG1 cells after 5 days in culture at pH 7.4 in presence of EGTA (10  $\mu\text{M}$ ). Nuclei were visualized by Draq5. Scale bar = 20  $\mu\text{m}$ . **(E)** EdU incorporation (upper panels) and Ki67 positive cells (lower panels) at pH 7.4 and pH 6.5 and at pH7.4 in presence of SKF96365 (10  $\mu\text{M}$ ) for TG1 cells. Scale bar: 5  $\mu\text{m}$ . Pictures taken with a 63X 1.40 N.A. objective on a Leica SP8 upright confocal microscope.

**Figure S6. Expression of the members of the Store-Operated Calcium Entry.**

Expression of *STIM* and *ORAI* family members in TG1 cells was assessed by QRT-PCR cultured for 5 days either in NS34 at pH7.4 (black bars, proliferative condition) or in NS34 at pH 6.5 (open bars, quiescent condition). Results are given relative to *TBP* (TATA-Box Binding Protein) expression level. Error bars are derived from 3 independent experiments.

**Figure S7. Mitochondrial morphology remodeling in BTIC25 cells.** Confocal microscopy analysis of mitochondria shapes in proliferating (left panel, pH 7.4), in quiescent BTIC25 cells (middle panel, pH 6.5) and in SKF96365-treated BTIC25 cells (right panel, pH 7.4 + SKF96365 10  $\mu$ M). Mitochondria were labeled with TOM20 antibody (green) and nucleus with Draq5 (red). Tubular mitochondria are found in proliferating BTIC25 cells (left panel and Inset) and donut-shaped mitochondria in quiescent and SKF96365-treated BTIC25 cells (Middle and right panel). Pictures taken with a 63X 1.40 N.A. objective on a Leica SP8 upright confocal microscope. Scale bars: 10  $\mu$ m.

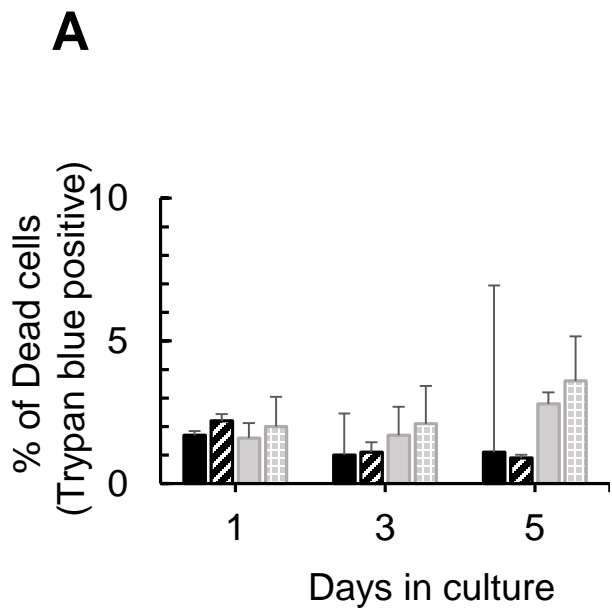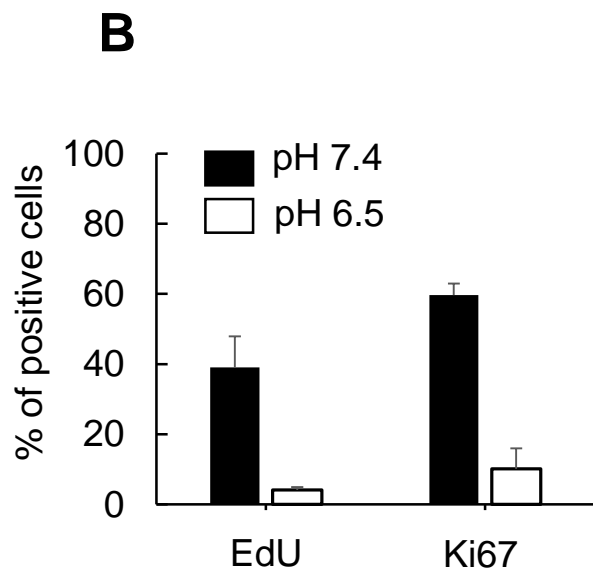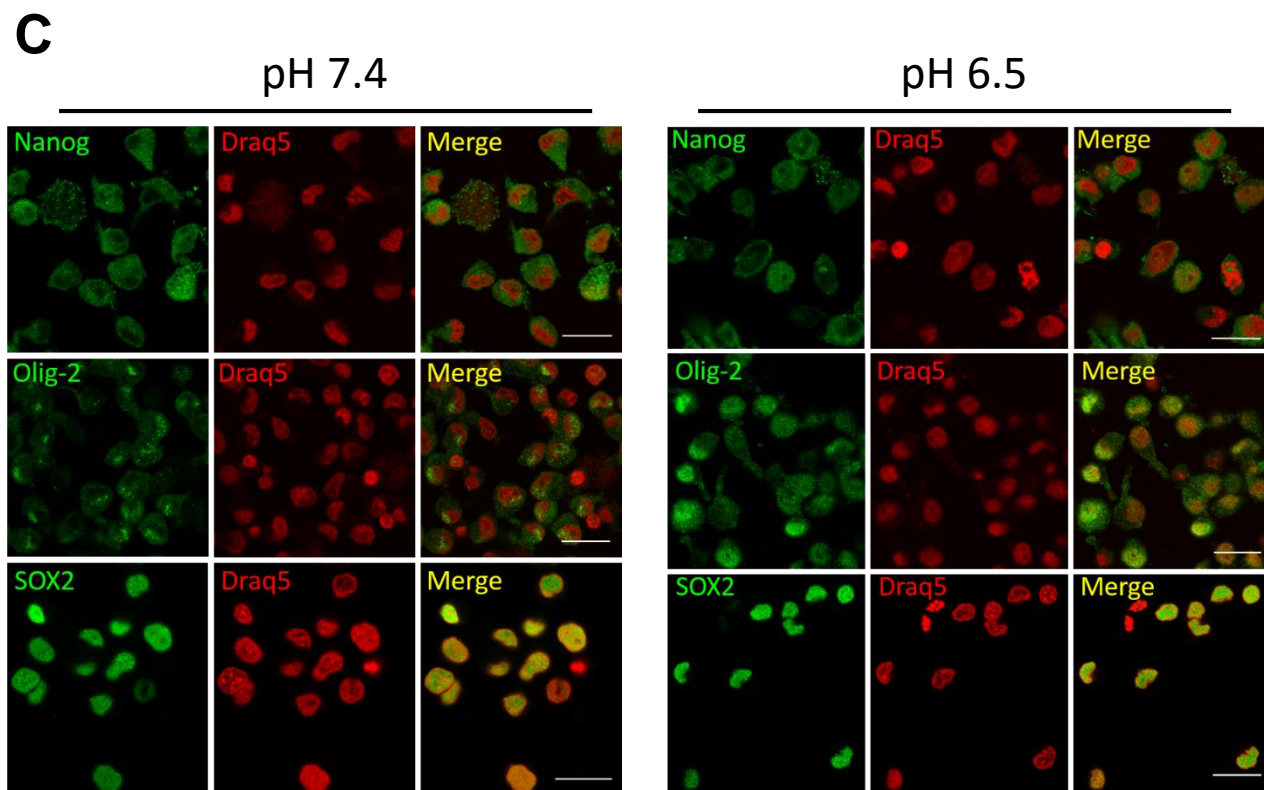

**A**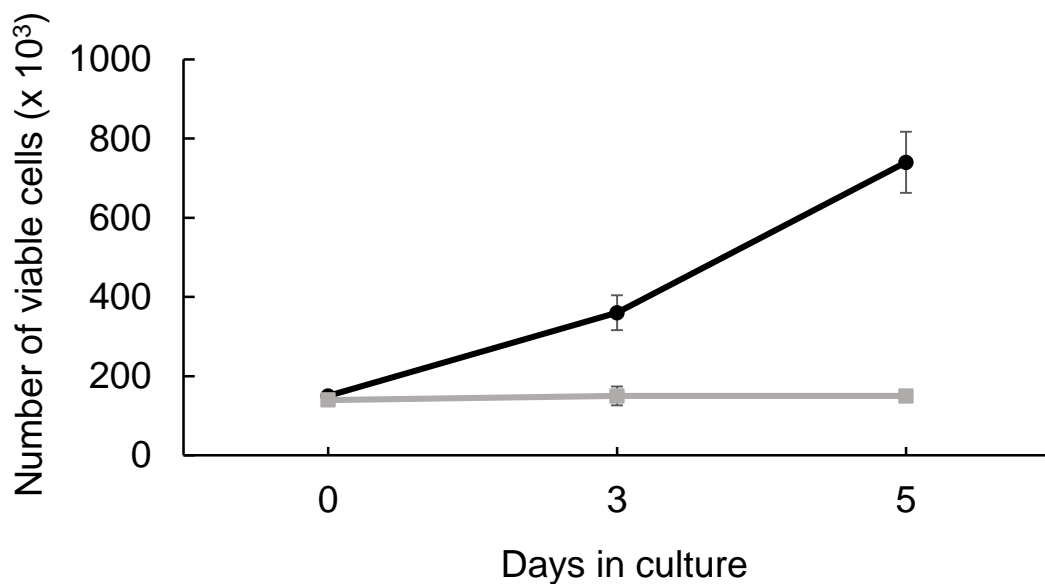**B**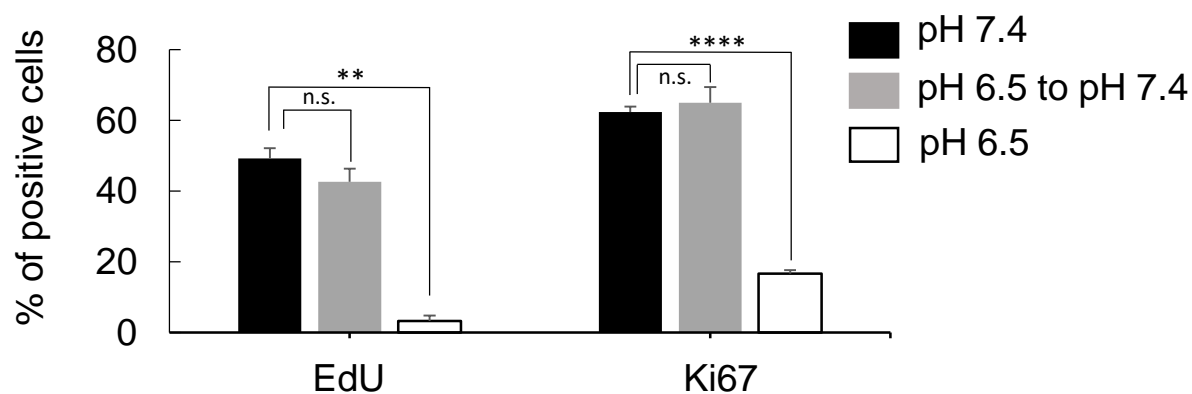**C**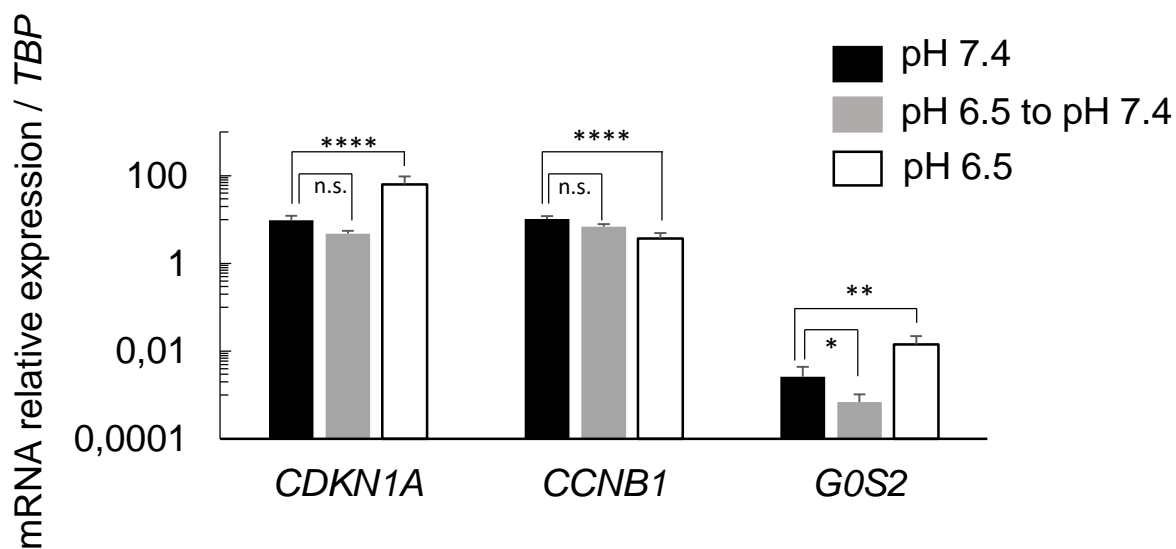

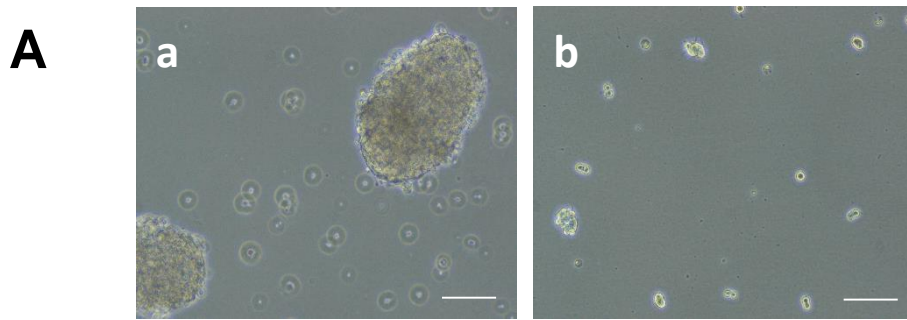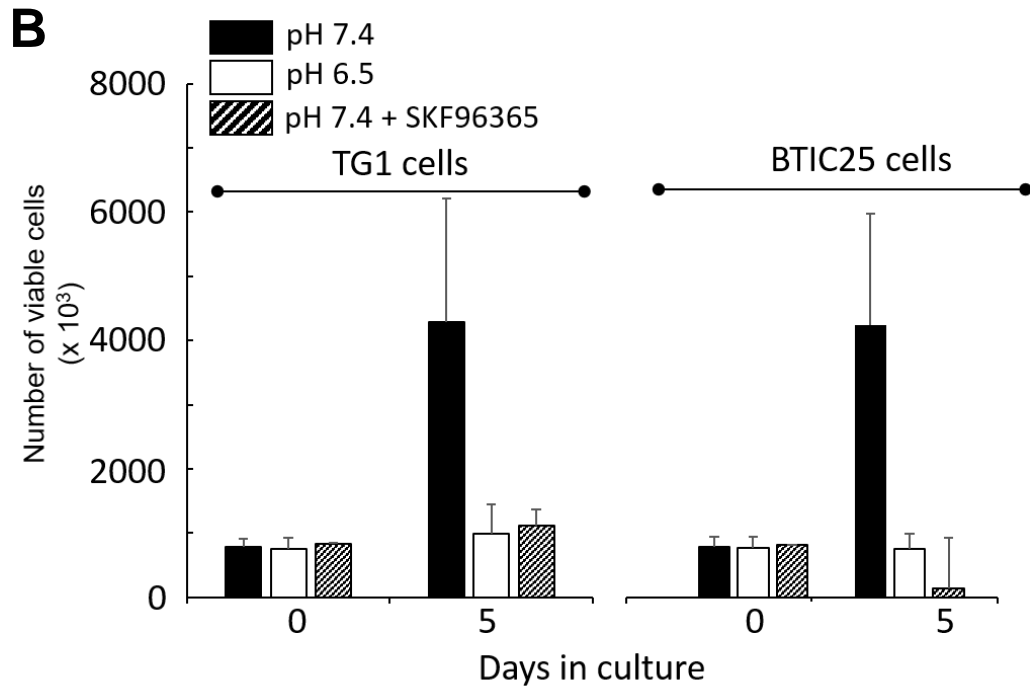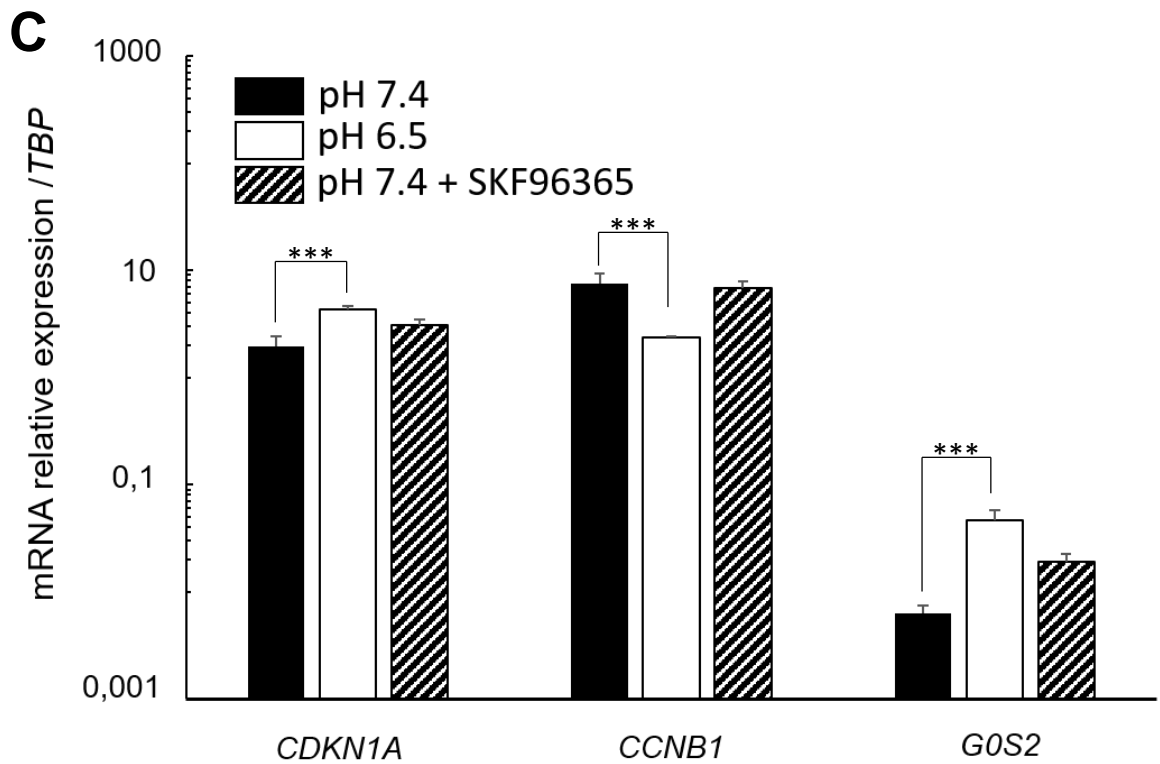

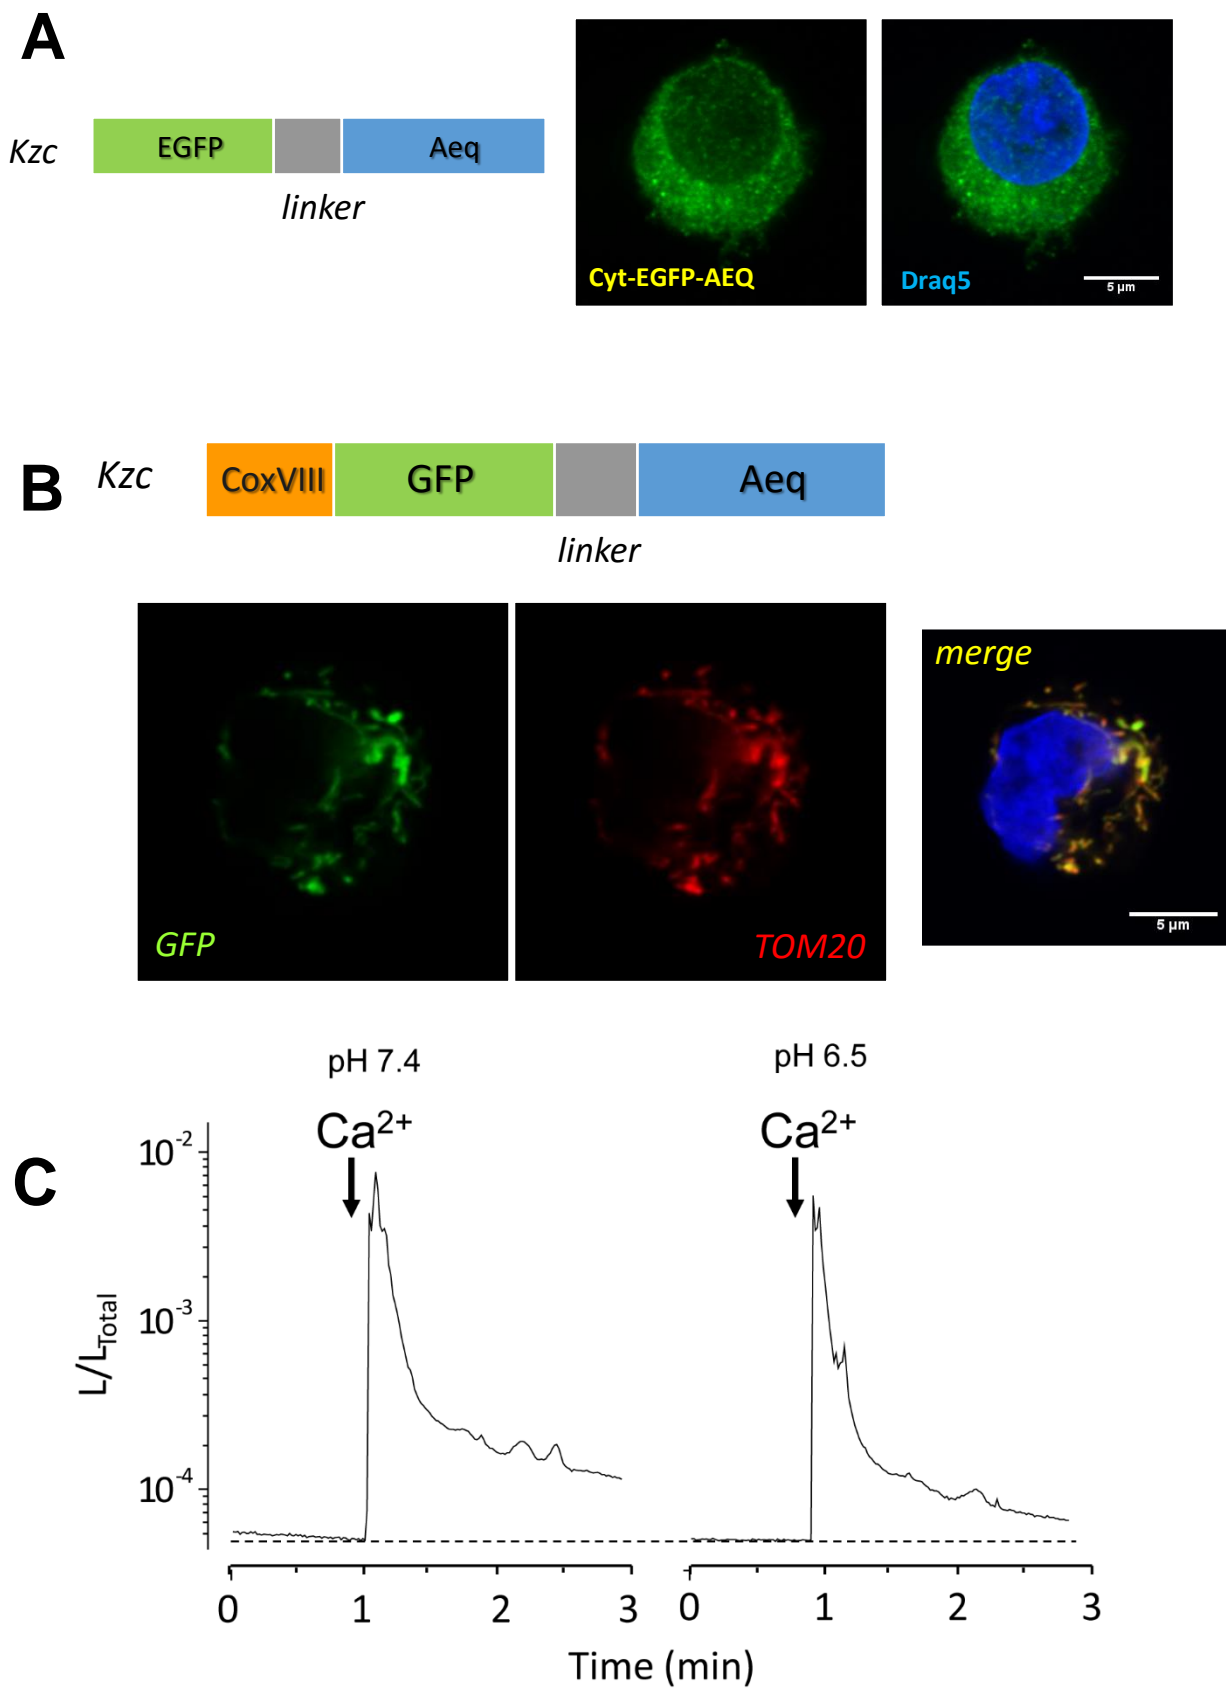

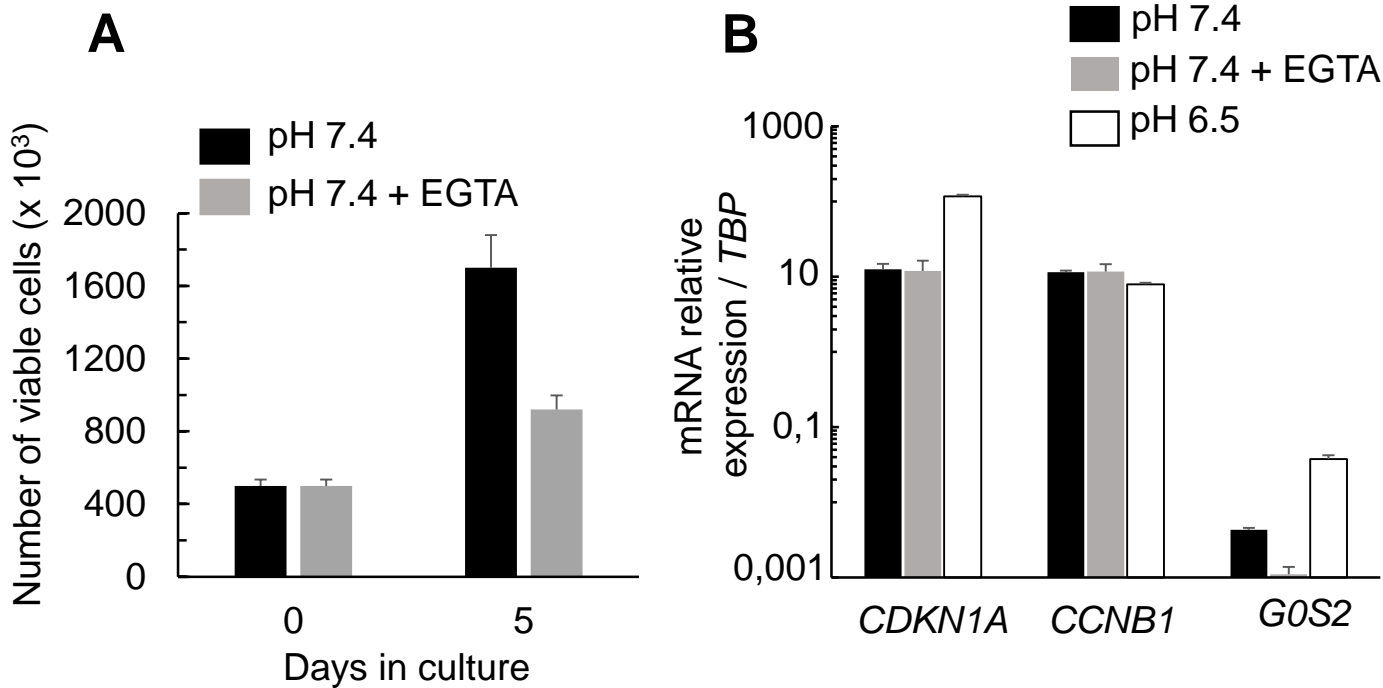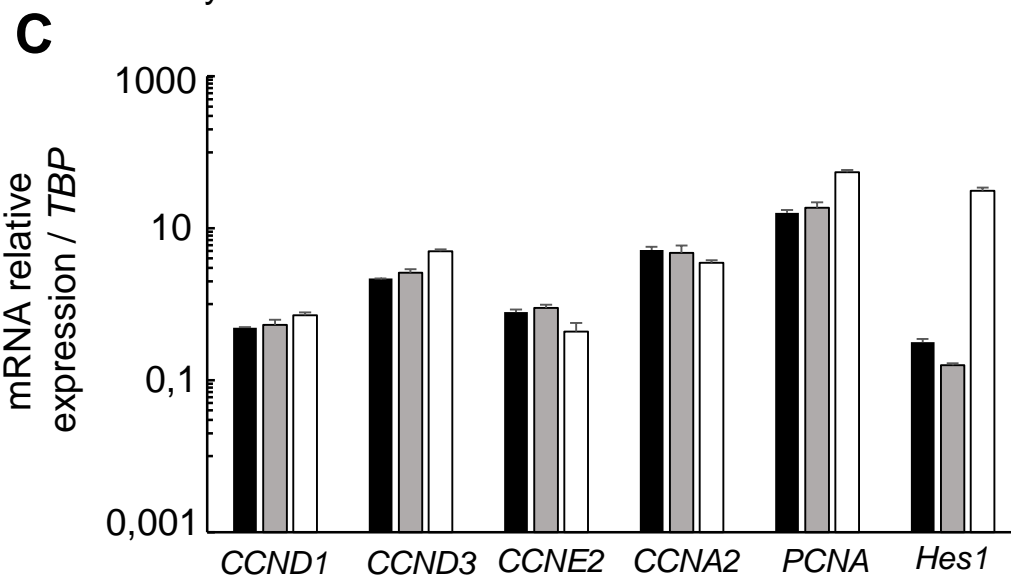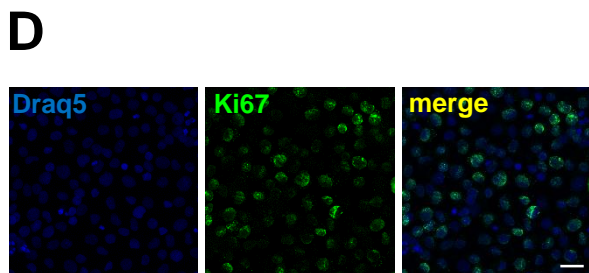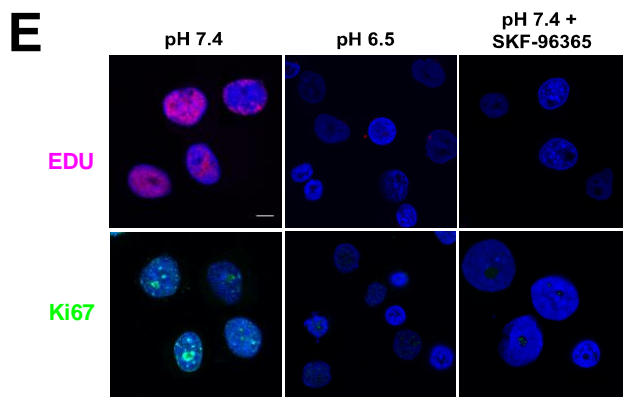

Figure S6

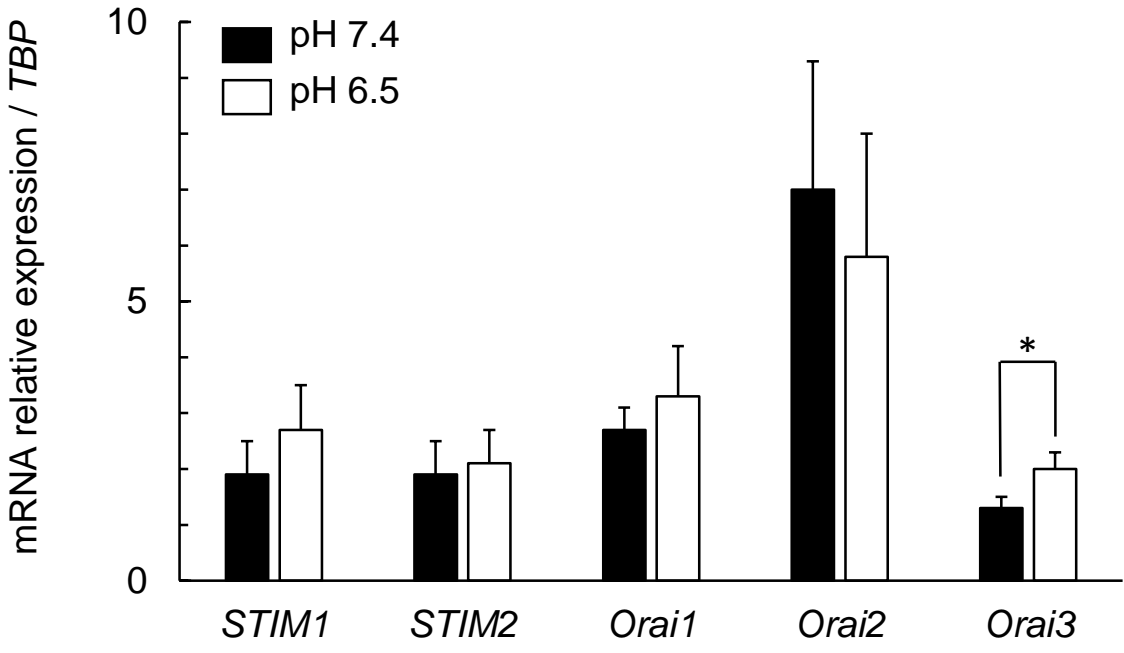



Figure S7

NS34, pH 7.4

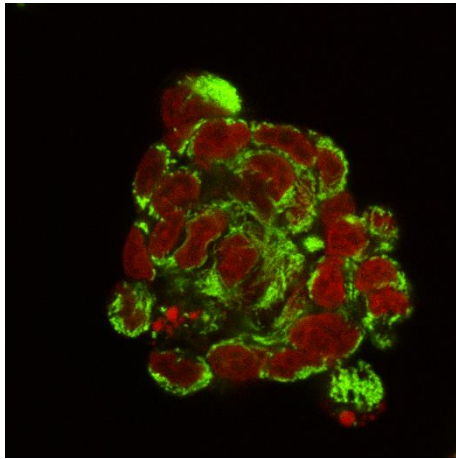

NS34, pH 6.5

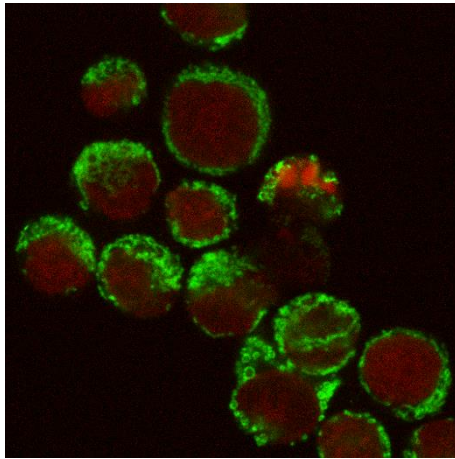

NS34, pH 7.4  
+ SKF96365

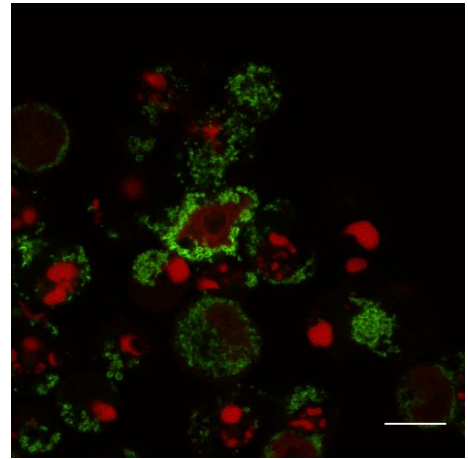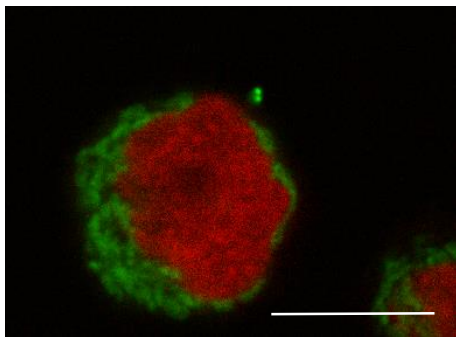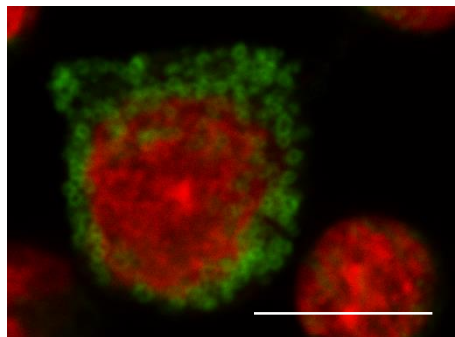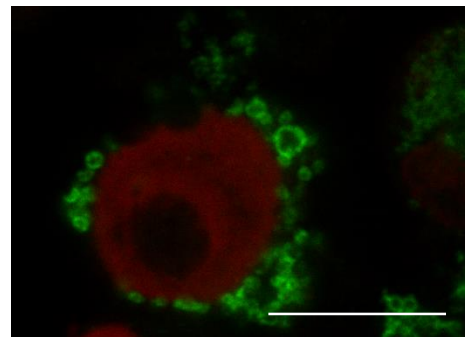

Supplement: 41598_2018_28157_MOESM1_ESM.pdf [file 41598_2018_28157_MOESM1_ESM.pdf]
